# Supplementary material
Source: publisher site journal article supplement (https://static.cambridge.org/content/id/urn:cambridge.org:id:article:S1368980020002025/resource/name/S1368980020002025supp001.pdf)

# Healthy Store Environment Tool

## INSTRUCTION SHEET

### Aim:

The aim of this tool is to:

Enable an overview of a store's healthiness taking into consideration: the availability of healthier products, their placement and promotion, as well as limiting availability and activity around less healthy choices

### Contents & Instructions

#### Observational checklist

1. Fruit & Vegetables – Fresh, frozen, canned/dried
2. Drinks – Bottled water, sugar sweetened beverages, juice, cordial
3. Snack foods – Healthier snacks, lollies, chocolate, chips, ice-creams, sweet biscuits & cakes, savoury biscuits
4. Meals/convenience foods – Ready-to-eat, Heat-and-eat
5. Breads & Cereals – Bread, breakfast cereals, pasta/rice/noodles
6. Meat & Seafood – Refrigerated/frozen, canned, deli meats
7. Dairy & Eggs – Milk, cheese, yoghurt, eggs

### The 4 P's

#### Product

- Consider multiple locations in the store, e.g. fridges, front of store, checkout
- Only consider what is available at the time of completing the tool
- Discussion around usual product availability can be noted at the end

#### Placement

- Consider the main section as well as any displays

#### Price

- Refers to price promotion: Sales, discounts, deals, specials that are visibly advertised
- Does not include regular everyday price tickets inserted into shelf stripping
- Does not include pricing policy (i.e. subsidies) unless visibly advertised in-store
- Does not include markdowns (e.g. for "going out-of-date" products) unless there is associated promotion (e.g. clearance display, signage)

#### Promotion

- Refers to promotional materials or activities NOT relating to price
- Includes posters, signage, ticketing, recipe cards, give-aways and demonstrations
- May include promotional material placed separately from the promoted product (e.g. poster promoting water in the fruit and vegetable section)
- Also includes distributor branding e.g. branded fridges, ice-cream freezer, other displays. Does not include price promotions

# 1. Fruit & Vegetables

|                                    | <b>Product availability</b><br>Check fridges, shelves, front of store, checkout                                                                                                                                                                           | <b>Placement</b><br>Consider main section and displays                                                                                                                                                                                                                                                                                            | <b>Price</b>                                                                                                                                                                                                                                                                                    | <b>Promotional material or activity</b>                                                                                                                                                                                                                                                       |
|------------------------------------|-----------------------------------------------------------------------------------------------------------------------------------------------------------------------------------------------------------------------------------------------------------|---------------------------------------------------------------------------------------------------------------------------------------------------------------------------------------------------------------------------------------------------------------------------------------------------------------------------------------------------|-------------------------------------------------------------------------------------------------------------------------------------------------------------------------------------------------------------------------------------------------------------------------------------------------|-----------------------------------------------------------------------------------------------------------------------------------------------------------------------------------------------------------------------------------------------------------------------------------------------|
| <b>Fresh fruit</b>                 | Loose fruit (well stocked)..... Y <input type="checkbox"/> N <input type="checkbox"/><br>Pre-cut fruit..... Y <input type="checkbox"/> N <input type="checkbox"/><br>Fruit packs..... Y <input type="checkbox"/> N <input type="checkbox"/>               | Visible on entering store. Y <input type="checkbox"/> N <input type="checkbox"/><br>At or near checkout..... Y <input type="checkbox"/> N <input type="checkbox"/><br>Well-presented..... Y <input type="checkbox"/> N <input type="checkbox"/><br><i>Junk-food in fruit section*</i> ..... Y <input type="checkbox"/> N <input type="checkbox"/> | Is there advertised price promotion on fruit and/or vegetables?..... Y <input type="checkbox"/> N <input type="checkbox"/><br><br>Type of price promotion (discounts, deals etc):<br><br>Is the price promotion visible/easy to see?..... Y <input type="checkbox"/> N <input type="checkbox"/> | Is there promotional material or activity on fruit and/or vegetables?.. Y <input type="checkbox"/> N <input type="checkbox"/><br><br>Type of promotion (displays, posters, shelf labels etc):<br><br>Does the promotion stand out?..... Y <input type="checkbox"/> N <input type="checkbox"/> |
| <b>Fresh vegetables</b>            | Loose veggies (well stocked)... Y <input type="checkbox"/> N <input type="checkbox"/><br>Pre-cut vegetables..... Y <input type="checkbox"/> N <input type="checkbox"/><br>Soup/salad/veg packs..... Y <input type="checkbox"/> N <input type="checkbox"/> | Visible on entering store. Y <input type="checkbox"/> N <input type="checkbox"/><br>At or near checkout Y <input type="checkbox"/> N <input type="checkbox"/><br>Well-presented..... Y <input type="checkbox"/> N <input type="checkbox"/><br><i>Junk-food in vegetable section*</i> ..... Y <input type="checkbox"/> N <input type="checkbox"/>  |                                                                                                                                                                                                                                                                                                 |                                                                                                                                                                                                                                                                                               |
| <b>Frozen fruit and vegetables</b> | Frozen vegetables (well stocked and other than potato chips)... Y <input type="checkbox"/> N <input type="checkbox"/><br>Frozen fruit..... Y <input type="checkbox"/> N <input type="checkbox"/>                                                          | Easy to find..... Y <input type="checkbox"/> N <input type="checkbox"/><br>At eye level/arm's reach. Y <input type="checkbox"/> N <input type="checkbox"/>                                                                                                                                                                                        |                                                                                                                                                                                                                                                                                                 |                                                                                                                                                                                                                                                                                               |
| <b>Fruit: Canned/dried</b>         | Tinned fruit in natural juice (well stocked) ..... Y <input type="checkbox"/> N <input type="checkbox"/><br>Dried fruit (no added sugar/salt)... Y <input type="checkbox"/> N <input type="checkbox"/>                                                    | Easy to find..... Y <input type="checkbox"/> N <input type="checkbox"/><br>At eye level/arm's reach. Y <input type="checkbox"/> N <input type="checkbox"/>                                                                                                                                                                                        |                                                                                                                                                                                                                                                                                                 |                                                                                                                                                                                                                                                                                               |
| <b>Vegetables: Canned/dried</b>    | Tinned vegetables (well stocked)..... Y <input type="checkbox"/> N <input type="checkbox"/><br>Legumes (e.g. 4 bean mix, kidney) Y <input type="checkbox"/> N <input type="checkbox"/>                                                                    | Easy to find..... Y <input type="checkbox"/> N <input type="checkbox"/><br>At eye level/arm's reach. Y <input type="checkbox"/> N <input type="checkbox"/>                                                                                                                                                                                        |                                                                                                                                                                                                                                                                                                 |                                                                                                                                                                                                                                                                                               |

\* Items in italics are NOT considered good practice

Notes:

Score:

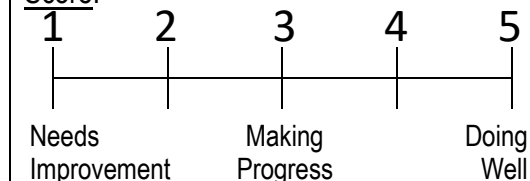

## 2. Drinks

|                                                         | <b>Product availability</b><br>Check fridges, shelves, front of store, checkout                                                                                                                                                                                                                                                       | <b>Placement</b><br>Consider main section and displays                                                                                                                                                                                                                                                                                                                                                                                                                                                                                                                                                                                                                                            | <b>Price</b>                                                                                                                                                                                                                                                                                                                                                                                           | <b>Promotional material or activity</b>                                                                                                                                                                                                                                                                                                                                                                      |
|---------------------------------------------------------|---------------------------------------------------------------------------------------------------------------------------------------------------------------------------------------------------------------------------------------------------------------------------------------------------------------------------------------|---------------------------------------------------------------------------------------------------------------------------------------------------------------------------------------------------------------------------------------------------------------------------------------------------------------------------------------------------------------------------------------------------------------------------------------------------------------------------------------------------------------------------------------------------------------------------------------------------------------------------------------------------------------------------------------------------|--------------------------------------------------------------------------------------------------------------------------------------------------------------------------------------------------------------------------------------------------------------------------------------------------------------------------------------------------------------------------------------------------------|--------------------------------------------------------------------------------------------------------------------------------------------------------------------------------------------------------------------------------------------------------------------------------------------------------------------------------------------------------------------------------------------------------------|
| <b>Bottled water</b>                                    | Refrigerated..... Y <input type="checkbox"/> N <input type="checkbox"/><br>On the shelf..... Y <input type="checkbox"/> N <input type="checkbox"/>                                                                                                                                                                                    | Visible on entering store. Y <input type="checkbox"/> N <input type="checkbox"/><br>At front of store..... Y <input type="checkbox"/> N <input type="checkbox"/><br>In all drinks fridges..... Y <input type="checkbox"/> N <input type="checkbox"/><br>easy to find?..... Y <input type="checkbox"/> N <input type="checkbox"/><br>Refrigerated water at child eye level/arm's reach..... Y <input type="checkbox"/> N <input type="checkbox"/>                                                                                                                                                                                                                                                  | Is there advertised price promotion on water or diet drinks?..... Y <input type="checkbox"/> N <input type="checkbox"/><br><br>Type of promotion (discounts, deals etc):                                                                                                                                                                                                                               | Is there promotional material or activity on water or diet drinks?..... Y <input type="checkbox"/> N <input type="checkbox"/><br><br>Type of promotion (displays, posters, signs etc):                                                                                                                                                                                                                       |
| <b>Soft Drinks Sports &amp; energy Drinks and Juice</b> | Smaller bottles/cans(<375mL) Y <input type="checkbox"/> N <input type="checkbox"/><br>Diet soft drinks..... Y <input type="checkbox"/> N <input type="checkbox"/><br>Diet sports drinks..... Y <input type="checkbox"/> N <input type="checkbox"/><br>Fruit juice (≤250mL)..... Y <input type="checkbox"/> N <input type="checkbox"/> | <i>Any sugary drinks*:</i><br>-Visible on entering store Y <input type="checkbox"/> N <input type="checkbox"/><br>-At or near checkout..... Y <input type="checkbox"/> N <input type="checkbox"/><br>-In high traffic area..... Y <input type="checkbox"/> N <input type="checkbox"/><br>-At child eye level/ reach. Y <input type="checkbox"/> N <input type="checkbox"/><br><br>No-added-sugar option including water:<br>-Near regular option..... Y <input type="checkbox"/> N <input type="checkbox"/><br>-At eye level/arm's reach Y <input type="checkbox"/> N <input type="checkbox"/><br>-Same or more space as sugary drinks..... Y <input type="checkbox"/> N <input type="checkbox"/> | Product type (water, diet drinks, diet cordial, other):<br><br>Is the promotion visible/easy to see?..... Y <input type="checkbox"/> N <input type="checkbox"/><br><br><i>Is there advertised price promotion on sugary drinks?*</i> ..... Y <input type="checkbox"/> N <input type="checkbox"/><br><br>Type of promotion (discounts, deals etc):<br><br>Product type (sugary drinks, cordial, other): | Product type (water, diet drinks, diet cordial, other):<br><br>Does the promotion stand out?..... Y <input type="checkbox"/> N <input type="checkbox"/><br><br><i>Is there promotional material or activity on sugary drinks?*</i> ..... Y <input type="checkbox"/> N <input type="checkbox"/><br><br>Type of promotion (displays, posters, signs etc):<br><br>Product type (sugary drinks, cordial, other): |
| <b>Cordial</b>                                          | Diet/no-added-sugar cordial..... Y <input type="checkbox"/> N <input type="checkbox"/>                                                                                                                                                                                                                                                | Diet/no-added-sugar option:<br>- Easy to find..... Y <input type="checkbox"/> N <input type="checkbox"/><br>- Near regular option..... Y <input type="checkbox"/> N <input type="checkbox"/><br>- Same or more space as regular cordial..... Y <input type="checkbox"/> N <input type="checkbox"/>                                                                                                                                                                                                                                                                                                                                                                                                | Type of promotion (discounts, deals etc):<br><br>Product type (sugary drinks, cordial, other):                                                                                                                                                                                                                                                                                                         | Type of promotion (displays, posters, signs etc):<br><br>Product type (sugary drinks, cordial, other):                                                                                                                                                                                                                                                                                                       |

\* Items in italics are NOT considered good practice

Notes:

Score:

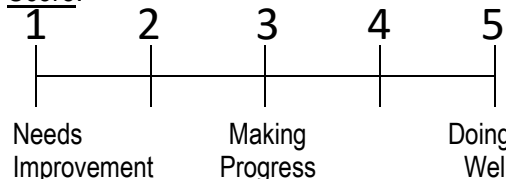

# 3. Snack Foods

|                                                       | <b>Product availability</b><br>Check fridges, shelves, front of store, checkout                                                                                                                                                                                                                                                                                                                                                                                                                                                                                                                                                                                                                           | <b>Placement</b><br>Consider main section and displays                                                                                                                                                                                                                                                                                                                                                                                                                                                                                               | <b>Price</b>                                                                                                                                                                                                                                                                                                                                                                                                                        | <b>Promotional material or activity</b>                                                                                                                                                                                                                                                                                                                                                                                       |
|-------------------------------------------------------|-----------------------------------------------------------------------------------------------------------------------------------------------------------------------------------------------------------------------------------------------------------------------------------------------------------------------------------------------------------------------------------------------------------------------------------------------------------------------------------------------------------------------------------------------------------------------------------------------------------------------------------------------------------------------------------------------------------|------------------------------------------------------------------------------------------------------------------------------------------------------------------------------------------------------------------------------------------------------------------------------------------------------------------------------------------------------------------------------------------------------------------------------------------------------------------------------------------------------------------------------------------------------|-------------------------------------------------------------------------------------------------------------------------------------------------------------------------------------------------------------------------------------------------------------------------------------------------------------------------------------------------------------------------------------------------------------------------------------|-------------------------------------------------------------------------------------------------------------------------------------------------------------------------------------------------------------------------------------------------------------------------------------------------------------------------------------------------------------------------------------------------------------------------------|
| <b>Healthier snack foods</b><br>(individual portions) | Dried fruit &/or nuts (unsalted) Y <input type="checkbox"/> N <input type="checkbox"/><br>Small tin/tub fruit (natural juice). Y <input type="checkbox"/> N <input type="checkbox"/><br>Pieces of fruit (whole/cut up)..... Y <input type="checkbox"/> N <input type="checkbox"/><br>Boiled eggs..... Y <input type="checkbox"/> N <input type="checkbox"/><br>Small yoghurt (no added sugar). Y <input type="checkbox"/> N <input type="checkbox"/><br>Cheese & crackers pack.. Y <input type="checkbox"/> N <input type="checkbox"/><br>Tuna & crackers/beans Y <input type="checkbox"/> N <input type="checkbox"/><br>Small tin baked beans..... Y <input type="checkbox"/> N <input type="checkbox"/> | At eye level/arm's reach.. Y <input type="checkbox"/> N <input type="checkbox"/><br>At or near checkout..... Y <input type="checkbox"/> N <input type="checkbox"/><br>Easy to find..... Y <input type="checkbox"/> N <input type="checkbox"/>                                                                                                                                                                                                                                                                                                        | Is there advertised price promotion on healthier snack foods?..... Y <input type="checkbox"/> N <input type="checkbox"/><br><br>Type of price promotion (discounts, deals etc):<br><br><br>Product type (individual portion snacks, healthier sweet biscuits/cakes, healthier savoury biscuits):                                                                                                                                    | Is there promotional material or activity on healthier snack foods?.... Y <input type="checkbox"/> N <input type="checkbox"/><br><br>Type of promotion (displays, posters, signs etc):<br><br><br>Product type (individual portion snacks, healthier sweet biscuits/cakes, healthier savoury biscuits):                                                                                                                       |
| <b>Lollies Chocolate &amp; Chips</b>                  | Limited range of lollies..... Y <input type="checkbox"/> N <input type="checkbox"/><br>Limited range of chocolate Y <input type="checkbox"/> N <input type="checkbox"/><br>Limited range of chips..... Y <input type="checkbox"/> N <input type="checkbox"/><br>Confectionery with toy*.... Y <input type="checkbox"/> N <input type="checkbox"/>                                                                                                                                                                                                                                                                                                                                                         | Only in one area of store Y <input type="checkbox"/> N <input type="checkbox"/><br>Limited shelf space..... Y <input type="checkbox"/> N <input type="checkbox"/><br><i>Any junk-food*:</i><br>-Visible on entering store Y <input type="checkbox"/> N <input type="checkbox"/><br>-Visible at or near checkout..... Y <input type="checkbox"/> N <input type="checkbox"/><br>-In high-traffic areas..... Y <input type="checkbox"/> N <input type="checkbox"/><br>-At child eye level/ reach. Y <input type="checkbox"/> N <input type="checkbox"/> | Is the price promotion visible/easy to see?..... Y <input type="checkbox"/> N <input type="checkbox"/><br><br>Is there advertised price promotion on less healthy snack foods?*.... Y <input type="checkbox"/> N <input type="checkbox"/><br><br>Type of price promotion (discounts, deals, etc):<br><br>Product type (lollies, chocolate, chips, ice creams, sweet biscuits/cakes – less healthy, savoury biscuits – less healthy) | Does the promotion stand out?..... Y <input type="checkbox"/> N <input type="checkbox"/><br><br>Is there promotional material or activity on less healthy snack foods?* ..... Y <input type="checkbox"/> N <input type="checkbox"/><br><br>Type of promotion (displays, posters, signs etc)<br><br>Product type (lollies, chocolate, chips, ice creams, sweet biscuits/cakes – less healthy, savoury biscuits – less healthy) |
| <b>Ice-creams</b><br>(single serve)                   |                                                                                                                                                                                                                                                                                                                                                                                                                                                                                                                                                                                                                                                                                                           | Visible on entering store* Y <input type="checkbox"/> N <input type="checkbox"/><br>At or near checkout*..... Y <input type="checkbox"/> N <input type="checkbox"/><br>In high-traffic areas*..... Y <input type="checkbox"/> N <input type="checkbox"/>                                                                                                                                                                                                                                                                                             | Is there advertised price promotion on less healthy snack foods?*.... Y <input type="checkbox"/> N <input type="checkbox"/><br><br>Type of price promotion (discounts, deals, etc):<br><br>Product type (lollies, chocolate, chips, ice creams, sweet biscuits/cakes – less healthy, savoury biscuits – less healthy)                                                                                                               | Is there promotional material or activity on less healthy snack foods?* ..... Y <input type="checkbox"/> N <input type="checkbox"/><br><br>Type of promotion (displays, posters, signs etc)<br><br>Product type (lollies, chocolate, chips, ice creams, sweet biscuits/cakes – less healthy, savoury biscuits – less healthy)                                                                                                 |
| <b>Sweet Biscuits and cakes</b>                       | Healthier options meeting nutrient criteria (criteria) Y <input type="checkbox"/> N <input type="checkbox"/><br>Limited range of less healthy options..... Y <input type="checkbox"/> N <input type="checkbox"/>                                                                                                                                                                                                                                                                                                                                                                                                                                                                                          | Healthier easy to find..... Y <input type="checkbox"/> N <input type="checkbox"/><br>Less healthy options:<br>-Limited shelf space..... Y <input type="checkbox"/> N <input type="checkbox"/><br>-At or near checkout*..... Y <input type="checkbox"/> N <input type="checkbox"/><br>-At end-of-aisle*..... Y <input type="checkbox"/> N <input type="checkbox"/>                                                                                                                                                                                    | Type of price promotion (discounts, deals, etc):<br><br>Product type (lollies, chocolate, chips, ice creams, sweet biscuits/cakes – less healthy, savoury biscuits – less healthy)                                                                                                                                                                                                                                                  | Type of promotion (displays, posters, signs etc)<br><br>Product type (lollies, chocolate, chips, ice creams, sweet biscuits/cakes – less healthy, savoury biscuits – less healthy)                                                                                                                                                                                                                                            |
| <b>Savoury biscuits</b>                               | Healthier options(<10g fat/100g e.g. Vita-Weat, Cruskits, Ryvita, Sakata rice crackers) ..... Y <input type="checkbox"/> N <input type="checkbox"/><br>Limited range of less healthy options..... Y <input type="checkbox"/> N <input type="checkbox"/>                                                                                                                                                                                                                                                                                                                                                                                                                                                   | Healthier option:<br>-Easy to find..... Y <input type="checkbox"/> N <input type="checkbox"/><br>-Near regular option..... Y <input type="checkbox"/> N <input type="checkbox"/><br>-At eye level/arm's reach Y <input type="checkbox"/> N <input type="checkbox"/>                                                                                                                                                                                                                                                                                  | Type of price promotion (discounts, deals, etc):<br><br>Product type (lollies, chocolate, chips, ice creams, sweet biscuits/cakes – less healthy, savoury biscuits – less healthy)                                                                                                                                                                                                                                                  | Type of promotion (displays, posters, signs etc)<br><br>Product type (lollies, chocolate, chips, ice creams, sweet biscuits/cakes – less healthy, savoury biscuits – less healthy)                                                                                                                                                                                                                                            |

\* Items in italics are NOT considered good practice

Notes:

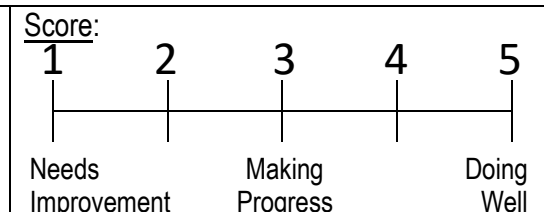

# 4. Meals/Convenience foods

|                                            | <b>Product availability</b><br>Check fridges, shelves, front of store, checkout                                                                                                                                                                                                                                                                                                                                                                                                                                   | <b>Placement</b><br>Consider main section and displays                                                                                                                                                                                                                                                                                                                     | <b>Price</b>                                                                                                                                                                                                                                                                                                                  | <b>Promotional material or activity</b>                                                                                                                                                                                                                                                                                                                                      |
|--------------------------------------------|-------------------------------------------------------------------------------------------------------------------------------------------------------------------------------------------------------------------------------------------------------------------------------------------------------------------------------------------------------------------------------------------------------------------------------------------------------------------------------------------------------------------|----------------------------------------------------------------------------------------------------------------------------------------------------------------------------------------------------------------------------------------------------------------------------------------------------------------------------------------------------------------------------|-------------------------------------------------------------------------------------------------------------------------------------------------------------------------------------------------------------------------------------------------------------------------------------------------------------------------------|------------------------------------------------------------------------------------------------------------------------------------------------------------------------------------------------------------------------------------------------------------------------------------------------------------------------------------------------------------------------------|
| <b>Cold 'Ready to Eat' items</b>           | - Sandwiches/rolls/wraps.. Y <input type="checkbox"/> N <input type="checkbox"/><br>- Salads..... Y <input type="checkbox"/> N <input type="checkbox"/><br>- Fruit salad..... Y <input type="checkbox"/> N <input type="checkbox"/><br>- Other healthier option (e.g.) _____                                                                                                                                                                                                                                      | Healthier option:<br>- Well-presented..... Y <input type="checkbox"/> N <input type="checkbox"/><br>- Easy to find..... Y <input type="checkbox"/> N <input type="checkbox"/>                                                                                                                                                                                              | Is there advertised price promotion on healthier meals/convenience foods?..... Y <input type="checkbox"/> N <input type="checkbox"/>                                                                                                                                                                                          | Is there promotional material or activity on healthier meals/convenience foods?..... Y <input type="checkbox"/> N <input type="checkbox"/>                                                                                                                                                                                                                                   |
| <b>Hot 'Ready to Eat' items</b>            | Pie warmer..... Y <input type="checkbox"/> N <input type="checkbox"/><br>Bain marie..... Y <input type="checkbox"/> N <input type="checkbox"/><br>Healthier options <i>if applicable</i> :<br>- Lean meat & veg meals.. Y <input type="checkbox"/> N <input type="checkbox"/><br>- Reduced fat/salt pies..... Y <input type="checkbox"/> N <input type="checkbox"/><br>- Reduced fat/salt sausage roll/pastie..... Y <input type="checkbox"/> N <input type="checkbox"/><br>- Other healthier option (e.g.) _____ | Healthier option:<br>- Well-presented..... Y <input type="checkbox"/> N <input type="checkbox"/><br>- Easy to find..... Y <input type="checkbox"/> N <input type="checkbox"/><br>- Near regular option..... Y <input type="checkbox"/> N <input type="checkbox"/><br>- Same or more space as less healthy option.... Y <input type="checkbox"/> N <input type="checkbox"/> | Type of price promotion (discounts, deals etc):<br><br>Product type:<br>Cold RTE items<br>Hot RTE items<br>Frozen heat & eat meals<br>Shelf stable heat & eat<br>Other                                                                                                                                                        | Type of promotion (displays, posters, signs etc):<br><br>Product type:<br>Cold RTE items<br>Hot RTE items<br>Frozen heat & eat meals<br>Shelf stable heat & eat<br>Other                                                                                                                                                                                                     |
| <b>Frozen 'Heat &amp; Eat' items</b>       | Microwave..... Y <input type="checkbox"/> N <input type="checkbox"/><br>Healthier frozen meat & veg meals (Per 100g: <10g fat; <400mg sodium) ..... Y <input type="checkbox"/> N <input type="checkbox"/><br>Reduced fat/salt frozen pie Y <input type="checkbox"/> N <input type="checkbox"/><br>Reduced fat/salt sausage roll/pastie..... Y <input type="checkbox"/> N <input type="checkbox"/><br>Other healthier option (e.g.) _____                                                                          | Healthier option:<br>- Easy to find..... Y <input type="checkbox"/> N <input type="checkbox"/><br>- Near regular option..... Y <input type="checkbox"/> N <input type="checkbox"/><br>- Same or more space as less healthy options... Y <input type="checkbox"/> N <input type="checkbox"/>                                                                                | Is the price promotion visible/easy to see?.....<br><br><i>Is there advertised price promotion on less healthy meals/convenience foods?*</i> ..... Y <input type="checkbox"/> N <input type="checkbox"/><br><br><i>Type of price promotion: (discounts, deals etc):</i> Y <input type="checkbox"/> N <input type="checkbox"/> | Does the promotion stand out?..... Y <input type="checkbox"/> N <input type="checkbox"/><br><br><i>Is there promotional material or activity on less healthy meals/convenience foods?*</i> ..... Y <input type="checkbox"/> N <input type="checkbox"/><br><br><i>Type of promotion (displays, posters, signs etc):</i> Y <input type="checkbox"/> N <input type="checkbox"/> |
| <b>Shelf-stable 'Heat &amp; Eat' items</b> | Canned soups..... Y <input type="checkbox"/> N <input type="checkbox"/><br>Reduced-salt baked beans Y <input type="checkbox"/> N <input type="checkbox"/><br>Shelf-stable meat & veg meals (Per 100g: <10g fat; <400mg sodium)... Y <input type="checkbox"/> N <input type="checkbox"/>                                                                                                                                                                                                                           | Healthier option:<br>- Easy to find..... Y <input type="checkbox"/> N <input type="checkbox"/><br>- Near regular option..... Y <input type="checkbox"/> N <input type="checkbox"/><br>- Same or more space as less healthy options... Y <input type="checkbox"/> N <input type="checkbox"/>                                                                                | <i>Product type:</i><br>Deep Fried<br>Regular fat/salt options<br>Other                                                                                                                                                                                                                                                       | <i>Product type:</i><br>Deep Fried<br>Regular fat/salt options<br>Other                                                                                                                                                                                                                                                                                                      |

\* Items in italics are NOT considered good practice

Notes:

Score:

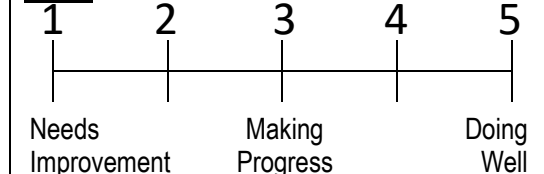

# 5. Breads & Cereals

|                           | <b>Product availability</b><br>Check fridges, shelves, front of store, checkout                                                                                                                                                                                                                                                                                                                                | <b>Placement</b><br>Consider main section and displays                                                                                                                                                                                                                                        | <b>Price</b>                                                                                                                                                                                                                                            | <b>Promotional material or activity</b>                                                                                                                                                                                                                         |
|---------------------------|----------------------------------------------------------------------------------------------------------------------------------------------------------------------------------------------------------------------------------------------------------------------------------------------------------------------------------------------------------------------------------------------------------------|-----------------------------------------------------------------------------------------------------------------------------------------------------------------------------------------------------------------------------------------------------------------------------------------------|---------------------------------------------------------------------------------------------------------------------------------------------------------------------------------------------------------------------------------------------------------|-----------------------------------------------------------------------------------------------------------------------------------------------------------------------------------------------------------------------------------------------------------------|
| <b>Bread</b>              | Wholemeal..... Y <input type="checkbox"/> N <input type="checkbox"/><br>Multi-grain..... Y <input type="checkbox"/> N <input type="checkbox"/><br>High Fibre fortified white... Y <input type="checkbox"/> N <input type="checkbox"/>                                                                                                                                                                          | Wholemeal/multigrain:<br>-Easy to find..... Y <input type="checkbox"/> N <input type="checkbox"/><br>-At eye level/arm's reach Y <input type="checkbox"/> N <input type="checkbox"/><br>-Same or more space as regular white bread..... Y <input type="checkbox"/> N <input type="checkbox"/> | Is there advertised price promotion on healthier breads and cereals?..... Y <input type="checkbox"/> N <input type="checkbox"/><br><br>Type of price promotion (discounts, deals etc):                                                                  | Is there promotional material or activity on healthier breads and cereals?..... Y <input type="checkbox"/> N <input type="checkbox"/><br><br>Type of promotion (displays, posters, signs etc):                                                                  |
| <b>Breakfast cereals</b>  | Weet-Bix..... Y <input type="checkbox"/> N <input type="checkbox"/><br>Rolled Oats..... Y <input type="checkbox"/> N <input type="checkbox"/><br>Other healthier options meeting nutrient criteria: Y <input type="checkbox"/> N <input type="checkbox"/><br>(Per 100g: Sat fat <2g; Fibre >5g; Sugar <20g – no dried fruit or <25g with dried fruit. e.g. Sultana Bran, All Bran, Sustain, Uncle Toby's Plus) | Healthier option:<br>- Easy to find..... Y <input type="checkbox"/> N <input type="checkbox"/><br>-At eye level/arm's reach Y <input type="checkbox"/> N <input type="checkbox"/><br>-Same or more space as less healthy options..... Y <input type="checkbox"/> N <input type="checkbox"/>   | Product type (wholemeal/multigrain bread, healthier breakfast cereals)<br><br>Is the price promotion visible/easy to see?..... Y <input type="checkbox"/> N <input type="checkbox"/>                                                                    | Product type (wholemeal/multigrain bread, healthier breakfast cereals)<br><br>Does the promotion stand out?..... Y <input type="checkbox"/> N <input type="checkbox"/>                                                                                          |
| <b>Pasta/rice/noodles</b> | Pasta..... Y <input type="checkbox"/> N <input type="checkbox"/><br>Rice..... Y <input type="checkbox"/> N <input type="checkbox"/><br>Noodles (e.g. hokkein, rice noodles, low-fat instant) Y <input type="checkbox"/> N <input type="checkbox"/>                                                                                                                                                             |                                                                                                                                                                                                                                                                                               | <i>Is there advertised price promotion on less healthy breads and cereals?*</i> ..... Y <input type="checkbox"/> N <input type="checkbox"/><br><br>Type of price promotion (discounts, deals etc):<br><br>Product type (less healthy breakfast cereals) | <i>Is there promotional material or activity on less healthy breads and cereals?*</i> ..... Y <input type="checkbox"/> N <input type="checkbox"/><br><br>Type of promotion (displays, posters, signs etc):<br><br>Product type (less healthy breakfast cereals) |

\* Items in italics are NOT considered good practice

Notes:

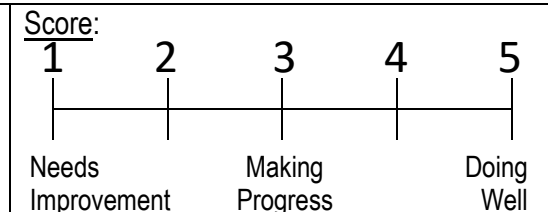

# 6. Meat & Seafood

|                        | <b>Product availability</b><br>Check fridges, shelves, front of store, checkout                                                                                                                                                                                                                                                                                                                                                                                                                        | <b>Placement</b><br>Consider main section and displays                                                                                                                                                                                                                                                                                                                 | <b>Price</b>                                                                                                                                                                                                                                                                                                                                                                                                                  | <b>Promotional material or activity</b>                                                                                                                                                                                                                                                                                                                                                                               |
|------------------------|--------------------------------------------------------------------------------------------------------------------------------------------------------------------------------------------------------------------------------------------------------------------------------------------------------------------------------------------------------------------------------------------------------------------------------------------------------------------------------------------------------|------------------------------------------------------------------------------------------------------------------------------------------------------------------------------------------------------------------------------------------------------------------------------------------------------------------------------------------------------------------------|-------------------------------------------------------------------------------------------------------------------------------------------------------------------------------------------------------------------------------------------------------------------------------------------------------------------------------------------------------------------------------------------------------------------------------|-----------------------------------------------------------------------------------------------------------------------------------------------------------------------------------------------------------------------------------------------------------------------------------------------------------------------------------------------------------------------------------------------------------------------|
| <b>Fridge/ freezer</b> | - Skinless chicken..... Y <input type="checkbox"/> N <input type="checkbox"/><br>- Lean beef/lamb/pork. Y <input type="checkbox"/> N <input type="checkbox"/><br>- Lean mince..... Y <input type="checkbox"/> N <input type="checkbox"/><br>- Other lean meats (kangaroo, rabbit, offal etc.) Y <input type="checkbox"/> N <input type="checkbox"/><br>- Fish/seafood meeting nutrient criteria (Per 100g: <1000kj; <5g sat. fat; <450mg sodium) Y <input type="checkbox"/> N <input type="checkbox"/> | Healthier option:<br>- Well-presented..... Y <input type="checkbox"/> N <input type="checkbox"/><br>- Easy to find..... Y <input type="checkbox"/> N <input type="checkbox"/><br>- Near regular option..... Y <input type="checkbox"/> N <input type="checkbox"/><br>- Same or more space as regular option..... Y <input type="checkbox"/> N <input type="checkbox"/> | Is there advertised price promotion on healthier meat & seafood?..... Y <input type="checkbox"/> N <input type="checkbox"/><br><br>Type of price promotion (discounts, deals etc):                                                                                                                                                                                                                                            | Is there promotional material or activity on healthier meat & seafood?..... Y <input type="checkbox"/> N <input type="checkbox"/><br><br>Type of promotion (displays, posters, signs etc):                                                                                                                                                                                                                            |
| <b>Canned</b>          | Low fat/salt corned beef.... Y <input type="checkbox"/> N <input type="checkbox"/><br>Canned fish/seafood..... Y <input type="checkbox"/> N <input type="checkbox"/>                                                                                                                                                                                                                                                                                                                                   | Healthier option:<br>- Well-presented..... Y <input type="checkbox"/> N <input type="checkbox"/><br>- Easy to find..... Y <input type="checkbox"/> N <input type="checkbox"/><br>- Near regular option..... Y <input type="checkbox"/> N <input type="checkbox"/>                                                                                                      | Product type (fresh or frozen, canned, deli meat)<br><br>Is the price promotion visible/easy to see?..... Y <input type="checkbox"/> N <input type="checkbox"/><br><br>Is there advertised price promotion on less healthy meat & seafood?..... Y <input type="checkbox"/> N <input type="checkbox"/><br><br>Type of price promotion (discounts, deals etc):<br><br>Product type (fatty meats, regular fat/salt corned beef): | Product type (fresh or frozen, canned, deli meat)<br><br>Does the promotion stand out?..... Y <input type="checkbox"/> N <input type="checkbox"/><br><br>Is there promotional material or activity on less healthy meat & seafood?..... Y <input type="checkbox"/> N <input type="checkbox"/><br><br>Type of promotion (displays, posters, signs etc):<br><br>Product type (fatty meat, regular fat/salt corned beef) |
| <b>Deli meats</b>      | Lower fat/salt option Per 100g: <1000kj; <3g sat. fat; <750mg sodium Y <input type="checkbox"/> N <input type="checkbox"/>                                                                                                                                                                                                                                                                                                                                                                             |                                                                                                                                                                                                                                                                                                                                                                        |                                                                                                                                                                                                                                                                                                                                                                                                                               |                                                                                                                                                                                                                                                                                                                                                                                                                       |

\* Items in italics are NOT considered good practice

Notes:

**Score:**

|                   |   |                 |   |            |
|-------------------|---|-----------------|---|------------|
| 1                 | 2 | 3               | 4 | 5          |
| Needs Improvement |   | Making Progress |   | Doing Well |

# 7. Dairy & Eggs

|                | <b>Product availability</b><br>Check fridges, shelves, front of store, checkout                                                                                                                                                                                                                                                                                                                                                                                                                                               | <b>Placement</b><br>Consider main section and displays                                                                                                                                                                                  | <b>Price</b>                                                                                                                                                                                                                                                                                                                                                                                                                                                                                                                                                                                                          | <b>Promotional material or activity</b>                                                                                                                                                                                                                                                                                                                                                                                                                                                                                                                                                                              |
|----------------|-------------------------------------------------------------------------------------------------------------------------------------------------------------------------------------------------------------------------------------------------------------------------------------------------------------------------------------------------------------------------------------------------------------------------------------------------------------------------------------------------------------------------------|-----------------------------------------------------------------------------------------------------------------------------------------------------------------------------------------------------------------------------------------|-----------------------------------------------------------------------------------------------------------------------------------------------------------------------------------------------------------------------------------------------------------------------------------------------------------------------------------------------------------------------------------------------------------------------------------------------------------------------------------------------------------------------------------------------------------------------------------------------------------------------|----------------------------------------------------------------------------------------------------------------------------------------------------------------------------------------------------------------------------------------------------------------------------------------------------------------------------------------------------------------------------------------------------------------------------------------------------------------------------------------------------------------------------------------------------------------------------------------------------------------------|
| <b>Milk</b>    | Fresh or UHT reduced fat... Y <input type="checkbox"/> N <input type="checkbox"/><br>Fresh or UHT full cream..... Y <input type="checkbox"/> N <input type="checkbox"/><br>Powdered reduced fat..... Y <input type="checkbox"/> N <input type="checkbox"/><br>Powdered full cream..... Y <input type="checkbox"/> N <input type="checkbox"/><br>Reduced fat flavoured milk. Y <input type="checkbox"/> N <input type="checkbox"/><br>Plain milk (individual serve)..... Y <input type="checkbox"/> N <input type="checkbox"/> | Easy to find..... Y <input type="checkbox"/> N <input type="checkbox"/><br>At eye level/arm's reach. Y <input type="checkbox"/> N <input type="checkbox"/><br>Well-presented..... Y <input type="checkbox"/> N <input type="checkbox"/> | Is there advertised price promotion on healthier products?..... Y <input type="checkbox"/> N <input type="checkbox"/><br><br>Type of price promotion (discounts, deals etc):<br><br>Product type (milk, cheese, yoghurt, eggs)<br><br>Is the price promotion visible/easy to see?..... Y <input type="checkbox"/> N <input type="checkbox"/><br><br><i>Is there advertised price promotion on less healthy products?*</i> ..... Y <input type="checkbox"/> N <input type="checkbox"/><br><br>Type of price promotion (discounts, deals etc):<br><br>Product type (Added sugar yoghurt, High fat/sugar dairy desserts) | Is there promotional material or activity on healthier products?..... Y <input type="checkbox"/> N <input type="checkbox"/><br><br>Type of promotion (displays, posters, signs etc):<br><br>Product type (milk, cheese, yoghurt, eggs)<br><br>Does the promotion stand out?..... Y <input type="checkbox"/> N <input type="checkbox"/><br><br><i>Is there promotional material or activity on less healthy products?*</i> .. Y <input type="checkbox"/> N <input type="checkbox"/><br><br>Type of promotion (displays, posters, signs etc):<br><br>Product type (Added sugar yoghurt, High fat/sugar dairy desserts) |
| <b>Cheese</b>  | Low-fat cheese..... Y <input type="checkbox"/> N <input type="checkbox"/><br>Regular cheese..... Y <input type="checkbox"/> N <input type="checkbox"/>                                                                                                                                                                                                                                                                                                                                                                        | Easy to find..... Y <input type="checkbox"/> N <input type="checkbox"/><br>At eye level/arm's reach. Y <input type="checkbox"/> N <input type="checkbox"/><br>Well-presented..... Y <input type="checkbox"/> N <input type="checkbox"/> | Is there advertised price promotion on less healthy products?..... Y <input type="checkbox"/> N <input type="checkbox"/><br><br>Type of price promotion (discounts, deals etc):<br><br>Product type (Added sugar yoghurt, High fat/sugar dairy desserts)                                                                                                                                                                                                                                                                                                                                                              | Does the promotion stand out?..... Y <input type="checkbox"/> N <input type="checkbox"/><br><br><i>Is there promotional material or activity on less healthy products?*</i> .. Y <input type="checkbox"/> N <input type="checkbox"/><br><br>Type of promotion (displays, posters, signs etc):<br><br>Product type (Added sugar yoghurt, High fat/sugar dairy desserts)                                                                                                                                                                                                                                               |
| <b>Yoghurt</b> | Low fat yoghurt (no added sugar) Y <input type="checkbox"/> N <input type="checkbox"/><br>Full fat yoghurt (no added sugar) Y <input type="checkbox"/> N <input type="checkbox"/>                                                                                                                                                                                                                                                                                                                                             | Easy to find..... Y <input type="checkbox"/> N <input type="checkbox"/><br>At eye level/arm's reach. Y <input type="checkbox"/> N <input type="checkbox"/><br>Well-presented..... Y <input type="checkbox"/> N <input type="checkbox"/> | Type of price promotion (discounts, deals etc):<br><br>Product type (Added sugar yoghurt, High fat/sugar dairy desserts)                                                                                                                                                                                                                                                                                                                                                                                                                                                                                              | Type of promotion (displays, posters, signs etc):<br><br>Product type (Added sugar yoghurt, High fat/sugar dairy desserts)                                                                                                                                                                                                                                                                                                                                                                                                                                                                                           |
| <b>Eggs</b>    | Fresh eggs..... Y <input type="checkbox"/> N <input type="checkbox"/>                                                                                                                                                                                                                                                                                                                                                                                                                                                         | Easy to find..... Y <input type="checkbox"/> N <input type="checkbox"/><br>At eye level/arm's reach. Y <input type="checkbox"/> N <input type="checkbox"/><br>Well-presented..... Y <input type="checkbox"/> N <input type="checkbox"/> | Type of price promotion (discounts, deals etc):<br><br>Product type (Added sugar yoghurt, High fat/sugar dairy desserts)                                                                                                                                                                                                                                                                                                                                                                                                                                                                                              | Type of promotion (displays, posters, signs etc):<br><br>Product type (Added sugar yoghurt, High fat/sugar dairy desserts)                                                                                                                                                                                                                                                                                                                                                                                                                                                                                           |

\* Items in italics are NOT considered good practice

Notes:

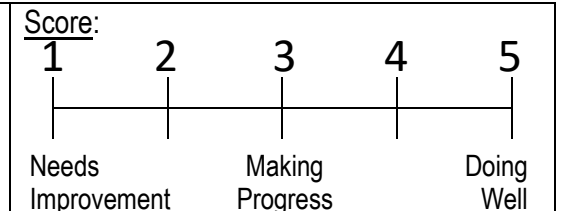

Supplement: Supplementary file 1 [file S1368980020002025supp001.pdf]
